# Supplementary material for: Development of a Ki-67-based clinical trial assay for neoadjuvant endocrine therapy response monitoring in breast cancer
Source: PubMed Central journal article supplement (PMC5543203; doi:10.1007/s10549-017-4329-y), 2017-06-13
Supplement: 10549_2017_4329_MOESM3_ESM.pdf [file 10549_2017_4329_MOESM3_ESM.pdf]

N+ PO24 Training Set  
30-9 Stained  
N= 70

9 cases removed due to one of the following reasons:

- No tumor
- Pre-analytical issue
- Antibody failure
- Difficult case to score
- Protein degradation

Cases successfully scanned,  
scored and included in correlation  
analysis  
N=61
