# Supplementary material for: Development of a Ki-67-based clinical trial assay for neoadjuvant endocrine therapy response monitoring in breast cancer
Source: PubMed Central journal article supplement (PMC5543203; doi:10.1007/s10549-017-4329-y), 2017-06-13

**A**

Scatter plot

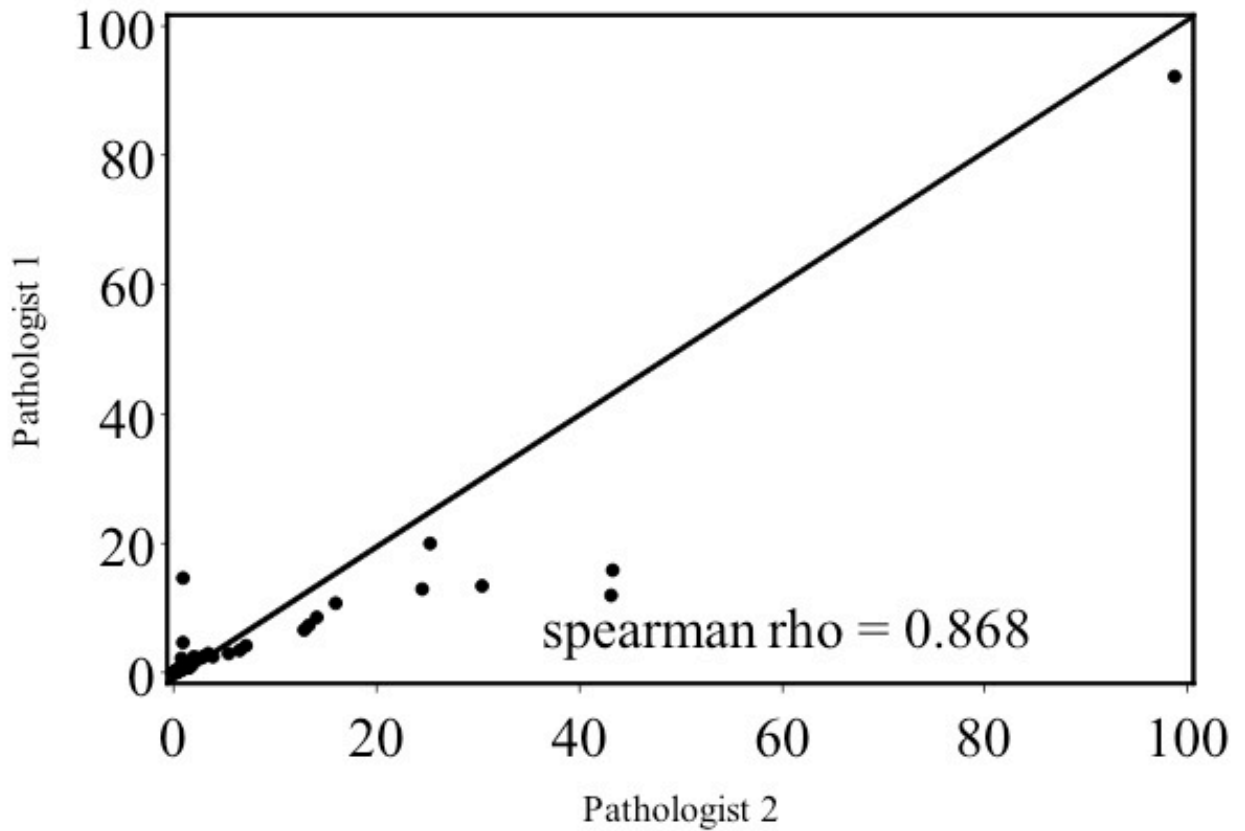**B**

Bland Altman plot

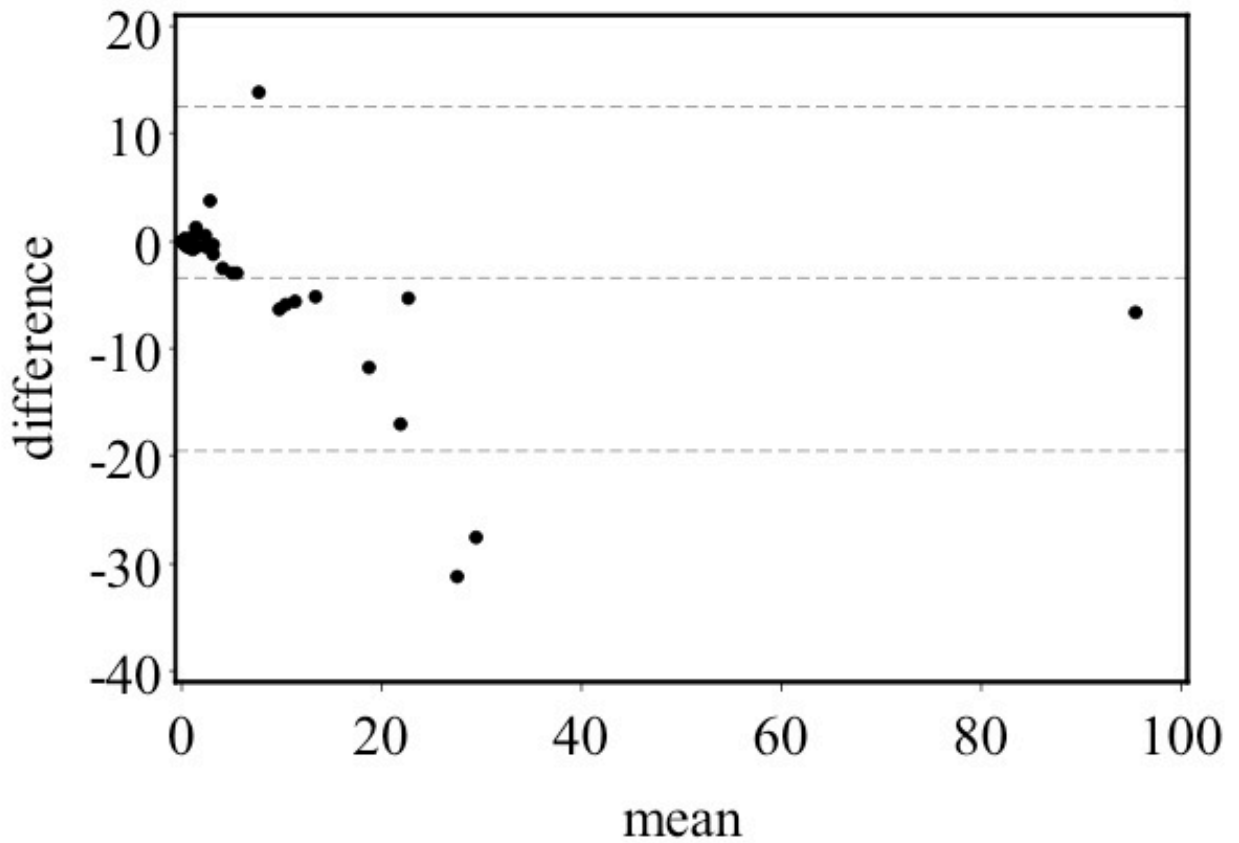

Supplement: 10549_2017_4329_MOESM6_ESM.pdf [file 10549_2017_4329_MOESM6_ESM.pdf]
